# Supplementary material for: Positive Preemptive Analgesia Effectiveness of Pregabalin Combined with Celecoxib in Total Knee Arthroplasty: A Prospective Controlled Randomized Study
Source: Hindawi journal article supplement (doi:10.1155/2023/7088004), 2023-01-12
Supplement: f1 [file 7088004.f1.pdf]

| 病人编号 | 住院号        | 组别 | 年龄 | 性别 | 体重指数  | 手术时间 | 热痛阈值差值 |
|------|------------|----|----|----|-------|------|--------|
| 1    | 1902110169 | 1  | 75 | 女  | 30.21 | 120  | 1.51   |
| 2    | 1901090306 | 1  | 59 | 女  | 23.15 | 79   | 1.12   |
| 3    | 1811240081 | 1  | 65 | 女  | 25.97 | 96   | 1.27   |
| 4    | 1811060172 | 1  | 53 | 女  | 20.32 | 63   | 0.96   |
| 5    | 1810090079 | 1  | 72 | 女  | 28.92 | 113  | 1.44   |
| 6    | 1810310207 | 1  | 65 | 女  | 25.91 | 95   | 1.27   |
| 7    | 1810120175 | 1  | 54 | 女  | 20.92 | 66   | 0.99   |
| 8    | 1907150079 | 1  | 52 | 女  | 18.44 | 52   | 0.86   |
| 9    | 1907150045 | 1  | 77 | 女  | 31.94 | 130  | 1.60   |
| 10   | 1907100323 | 1  | 61 | 女  | 24.27 | 86   | 1.18   |
| 11   | 1907090177 | 1  | 75 | 女  | 30.17 | 120  | 1.51   |
| 12   | 1907010350 | 1  | 67 | 女  | 26.85 | 101  | 1.32   |
| 13   | 1906120111 | 1  | 57 | 女  | 22.42 | 75   | 1.08   |
| 14   | 1906100298 | 1  | 72 | 女  | 29.08 | 114  | 1.45   |
| 15   | 1908200263 | 1  | 54 | 女  | 20.94 | 67   | 1.00   |
| 16   | 2002280025 | 1  | 71 | 女  | 28.35 | 109  | 1.41   |
| 17   | 2003260122 | 1  | 62 | 女  | 24.61 | 88   | 1.20   |
| 18   | 2003260240 | 1  | 68 | 女  | 27.33 | 104  | 1.35   |
| 19   | 2003280044 | 1  | 74 | 女  | 29.80 | 118  | 1.49   |
| 20   | 1905290283 | 1  | 63 | 女  | 25.14 | 91   | 1.23   |
| 21   | 1912180133 | 1  | 57 | 女  | 22.51 | 76   | 1.08   |
| 22   | 1912090127 | 1  | 76 | 女  | 30.98 | 125  | 1.55   |
| 23   | 1911200023 | 1  | 69 | 女  | 27.88 | 107  | 1.38   |
| 24   | 1911270104 | 1  | 59 | 女  | 23.26 | 80   | 1.12   |
| 25   | 1911130165 | 1  | 56 | 女  | 22.08 | 73   | 1.06   |
| 26   | 1910100304 | 1  | 59 | 女  | 23.27 | 80   | 1.12   |
| 27   | 1908210064 | 1  | 53 | 女  | 18.59 | 53   | 0.87   |
| 28   | 1903210081 | 1  | 57 | 男  | 22.25 | 74   | 1.07   |
| 29   | 1902210028 | 1  | 59 | 男  | 23.39 | 81   | 1.13   |
| 30   | 1809090083 | 1  | 70 | 男  | 28.24 | 109  | 1.40   |
| 31   | 1909090295 | 1  | 66 | 男  | 26.39 | 98   | 1.30   |
| 32   | 1909040260 | 1  | 60 | 男  | 23.70 | 82   | 1.15   |
| 33   | 1908010193 | 1  | 51 | 男  | 19.65 | 59   | 0.92   |
| 34   | 1907290336 | 1  | 55 | 男  | 17.17 | 45   | 0.79   |
| 35   | 1911110078 | 1  | 58 | 男  | 22.95 | 78   | 1.11   |
| 36   | 1907240306 | 1  | 54 | 男  | 20.83 | 66   | 0.99   |
| 37   | 1907240305 | 2  | 52 | 女  | 19.58 | 56   | 0.75   |
| 38   | 1907240304 | 2  | 62 | 女  | 25.43 | 88   | 1.20   |
| 39   | 1907220108 | 2  | 65 | 女  | 27.03 | 97   | 1.32   |
| 40   | 1909250145 | 2  | 61 | 女  | 24.38 | 82   | 1.12   |
| 41   | 1909170136 | 2  | 67 | 女  | 28.01 | 102  | 1.39   |
| 42   | 1910270029 | 2  | 60 | 女  | 24.26 | 82   | 1.11   |
| 43   | 1909160074 | 2  | 69 | 女  | 29.39 | 110  | 1.50   |
| 44   | 1910070063 | 2  | 68 | 女  | 28.56 | 105  | 1.44   |
| 45   | 1911250027 | 2  | 56 | 女  | 21.8  | 68   | 0.92   |
| 46   | 1911250094 | 2  | 50 | 女  | 18.25 | 49   | 0.65   |

|    |            |   |    |   |       |     |      |
|----|------------|---|----|---|-------|-----|------|
| 47 | 1911250150 | 2 | 54 | 女 | 20.86 | 63  | 0.85 |
| 48 | 1911180149 | 2 | 64 | 女 | 26.15 | 92  | 1.25 |
| 49 | 1911110173 | 2 | 60 | 女 | 23.97 | 80  | 1.09 |
| 50 | 1910290031 | 2 | 54 | 女 | 20.31 | 60  | 0.81 |
| 51 | 1811050237 | 2 | 43 | 女 | 14.07 | 26  | 0.33 |
| 52 | 2003050105 | 2 | 67 | 女 | 28.1  | 103 | 1.40 |
| 53 | 2004090055 | 2 | 67 | 女 | 28.22 | 104 | 1.41 |
| 54 | 2004140259 | 2 | 56 | 女 | 21.9  | 69  | 0.93 |
| 55 | 2004150259 | 2 | 47 | 女 | 16.77 | 41  | 0.54 |
| 56 | 2005050126 | 2 | 62 | 女 | 25.48 | 89  | 1.20 |
| 57 | 2005120287 | 2 | 72 | 女 | 30.98 | 119 | 1.62 |
| 58 | 1912020055 | 2 | 75 | 女 | 32.57 | 127 | 1.74 |
| 59 | 1809170312 | 2 | 54 | 女 | 20.76 | 63  | 0.84 |
| 60 | 1904160241 | 2 | 76 | 女 | 33.45 | 132 | 1.81 |
| 61 | 1911060103 | 2 | 61 | 女 | 24.81 | 85  | 1.15 |
| 62 | 1911090170 | 2 | 60 | 女 | 23.86 | 80  | 1.08 |
| 63 | 1907220378 | 2 | 68 | 女 | 28.89 | 107 | 1.46 |
| 64 | 1911130082 | 2 | 60 | 女 | 23.97 | 80  | 1.09 |
| 65 | 1911230051 | 2 | 67 | 男 | 28    | 102 | 1.39 |
| 66 | 2005070278 | 2 | 68 | 男 | 28.42 | 105 | 1.43 |
| 67 | 2004250127 | 2 | 62 | 男 | 25.45 | 88  | 1.20 |
| 68 | 1811140195 | 2 | 61 | 男 | 24.38 | 82  | 1.12 |
| 69 | 2006010277 | 2 | 61 | 男 | 24.39 | 83  | 1.12 |
| 70 | 2005270170 | 2 | 66 | 男 | 27.32 | 99  | 1.34 |
| 71 | 2005170132 | 2 | 64 | 男 | 26.2  | 92  | 1.26 |
| 72 | 1912170245 | 2 | 58 | 男 | 23.14 | 76  | 1.02 |
| 73 | 1912200149 | 2 | 65 | 男 | 27.1  | 97  | 1.32 |
| 74 | 1912230365 | 2 | 58 | 男 | 22.96 | 75  | 1.01 |
| 75 | 1910060048 | 3 | 71 | 女 | 28.86 | 106 | 1.45 |
| 76 | 1902160143 | 3 | 50 | 女 | 17.09 | 34  | 0.46 |
| 77 | 1809190112 | 3 | 69 | 女 | 27.45 | 98  | 1.33 |
| 78 | 1907070061 | 3 | 73 | 女 | 29.74 | 112 | 1.53 |
| 79 | 1901090115 | 3 | 66 | 女 | 26.02 | 89  | 1.21 |
| 80 | 1912300164 | 3 | 61 | 女 | 23    | 70  | 0.96 |
| 81 | 1811120144 | 3 | 60 | 女 | 22.77 | 69  | 0.94 |
| 82 | 2005310122 | 3 | 77 | 女 | 32.1  | 126 | 1.73 |
| 83 | 1912240043 | 3 | 57 | 女 | 20.83 | 57  | 0.77 |
| 84 | 2001130419 | 3 | 69 | 女 | 27.81 | 100 | 1.36 |
| 85 | 2003050100 | 3 | 68 | 女 | 27    | 95  | 1.30 |
| 86 | 2003190158 | 3 | 64 | 女 | 24.95 | 82  | 1.12 |
| 87 | 2003190211 | 3 | 51 | 女 | 17.84 | 38  | 0.52 |
| 88 | 2003240209 | 3 | 74 | 女 | 30.41 | 116 | 1.58 |
| 89 | 2003270052 | 3 | 58 | 女 | 21.8  | 63  | 0.86 |
| 90 | 2003310219 | 3 | 66 | 女 | 26.08 | 89  | 1.22 |
| 91 | 2001060084 | 3 | 47 | 女 | 15.43 | 24  | 0.32 |
| 92 | 2003050030 | 3 | 69 | 女 | 27.52 | 98  | 1.34 |
| 93 | 2003270015 | 3 | 79 | 女 | 33.13 | 133 | 1.81 |

|     |            |   |    |   |       |     |      |
|-----|------------|---|----|---|-------|-----|------|
| 94  | 2004100114 | 3 | 65 | 女 | 25.15 | 83  | 1.14 |
| 95  | 1902270237 | 3 | 62 | 女 | 23.74 | 75  | 1.02 |
| 96  | 1810120189 | 3 | 76 | 女 | 31.36 | 122 | 1.66 |
| 97  | 1904010326 | 3 | 71 | 女 | 28.78 | 106 | 1.45 |
| 98  | 1807148432 | 3 | 70 | 女 | 28.11 | 102 | 1.39 |
| 99  | 1905090264 | 3 | 64 | 女 | 25.08 | 83  | 1.13 |
| 100 | 1905130058 | 3 | 66 | 女 | 25.86 | 88  | 1.20 |
| 101 | 1905140039 | 3 | 72 | 女 | 29.07 | 108 | 1.47 |
| 102 | 1905140229 | 3 | 60 | 女 | 22.77 | 69  | 0.94 |
| 103 | 1905150031 | 3 | 72 | 女 | 29.09 | 108 | 1.47 |
| 104 | 1905220183 | 3 | 66 | 女 | 25.7  | 87  | 1.19 |
| 105 | 1901020150 | 3 | 66 | 男 | 25.81 | 88  | 1.19 |
| 106 | 1810110142 | 3 | 60 | 男 | 22.91 | 70  | 0.95 |
| 107 | 2005260046 | 3 | 63 | 男 | 24.06 | 77  | 1.05 |
| 108 | 2006070052 | 3 | 73 | 男 | 29.89 | 113 | 1.54 |
| 109 | 1904160228 | 3 | 47 | 男 | 15.32 | 23  | 0.31 |
| 110 | 1902140289 | 3 | 61 | 男 | 23.15 | 71  | 0.97 |
| 111 | 2004130034 | 3 | 64 | 男 | 25.01 | 83  | 1.13 |
| 112 | 2004200172 | 3 | 61 | 男 | 22.98 | 70  | 0.96 |
| 113 | 1911280059 | 4 | 69 | 女 | 28.86 | 109 | 1.46 |
| 114 | 1911110409 | 4 | 54 | 女 | 19.56 | 58  | 0.93 |
| 115 | 1911110202 | 4 | 58 | 女 | 22.09 | 72  | 1.07 |
| 116 | 1809090062 | 4 | 76 | 女 | 33.63 | 135 | 1.73 |
| 117 | 1903200088 | 4 | 61 | 女 | 24.09 | 83  | 1.19 |
| 118 | 1902130161 | 4 | 61 | 女 | 24.11 | 83  | 1.19 |
| 119 | 1812120031 | 4 | 65 | 女 | 26.85 | 98  | 1.34 |
| 120 | 1810160073 | 4 | 66 | 女 | 27.2  | 100 | 1.36 |
| 121 | 1905220173 | 4 | 69 | 女 | 28.87 | 109 | 1.46 |
| 122 | 1901020149 | 4 | 62 | 女 | 24.8  | 87  | 1.23 |
| 123 | 1810110121 | 4 | 72 | 女 | 30.94 | 120 | 1.58 |
| 124 | 2005260044 | 4 | 73 | 女 | 31.83 | 125 | 1.63 |
| 125 | 2006070059 | 4 | 50 | 女 | 17.46 | 46  | 0.81 |
| 126 | 1904160225 | 4 | 72 | 女 | 31.09 | 121 | 1.59 |
| 127 | 1902140277 | 4 | 73 | 女 | 31.81 | 125 | 1.63 |
| 128 | 2004130024 | 4 | 64 | 女 | 25.71 | 92  | 1.28 |
| 129 | 2004200151 | 4 | 66 | 女 | 26.96 | 98  | 1.35 |
| 130 | 1911280034 | 4 | 66 | 女 | 27.31 | 100 | 1.37 |
| 131 | 1911110123 | 4 | 63 | 女 | 25.4  | 90  | 1.26 |
| 132 | 1911110122 | 4 | 56 | 女 | 21.16 | 67  | 1.02 |
| 133 | 1809090452 | 4 | 55 | 女 | 20.02 | 60  | 0.95 |
| 134 | 1903200076 | 4 | 55 | 女 | 20.35 | 62  | 0.97 |
| 135 | 1902130153 | 4 | 57 | 女 | 21.7  | 70  | 1.05 |
| 136 | 1811120134 | 4 | 65 | 女 | 26.34 | 95  | 1.31 |
| 137 | 2005310154 | 4 | 59 | 女 | 23.02 | 77  | 1.12 |
| 138 | 1912240031 | 4 | 65 | 女 | 26.5  | 96  | 1.32 |
| 139 | 2001130421 | 4 | 60 | 女 | 23.42 | 79  | 1.15 |
| 140 | 2003050112 | 4 | 57 | 女 | 21.39 | 68  | 1.03 |

|     |             |   |    |   |       |     |      |
|-----|-------------|---|----|---|-------|-----|------|
| 141 | 2003190152  | 4 | 59 | 女 | 22.96 | 76  | 1.12 |
| 142 | 2003190121  | 4 | 57 | 男 | 21.62 | 69  | 1.04 |
| 143 | 1905290223  | 4 | 61 | 男 | 24.26 | 84  | 1.20 |
| 144 | 1912180113  | 4 | 66 | 男 | 27.05 | 99  | 1.35 |
| 145 | 1912090221  | 4 | 58 | 男 | 22.33 | 73  | 1.08 |
| 146 | 19112000223 | 4 | 55 | 男 | 20.1  | 61  | 0.96 |
| 147 | 1911270123  | 4 | 75 | 男 | 32.67 | 130 | 1.68 |
| 148 | 1911130264  | 4 | 64 | 男 | 25.83 | 92  | 1.28 |
| 149 | 1910100204  | 4 | 69 | 男 | 28.83 | 109 | 1.46 |

| 热痛阈值差值24h | 热痛阈值差值48h | 超C术前 | 超C3   | 超C24  | 超C48   | ASA分级 |
|-----------|-----------|------|-------|-------|--------|-------|
| 4.39      | 4.12      | 2.65 | 27.24 | 57.43 | 151.08 | III   |
| 2.83      | 2.75      | 1.78 | 21.91 | 49.05 | 134.97 | II    |
| 3.45      | 3.30      | 2.13 | 24.04 | 52.40 | 141.41 | II    |
| 2.21      | 2.20      | 1.43 | 19.78 | 45.70 | 128.53 | II    |
| 4.11      | 3.87      | 2.49 | 26.27 | 55.90 | 148.14 | III   |
| 3.44      | 3.29      | 2.12 | 23.99 | 52.32 | 141.26 | II    |
| 2.34      | 2.32      | 1.51 | 20.23 | 46.41 | 129.90 | II    |
| 1.79      | 1.83      | 1.20 | 18.36 | 43.46 | 124.23 | II    |
| 4.77      | 4.46      | 2.87 | 28.55 | 59.48 | 155.03 | III   |
| 3.08      | 2.97      | 1.92 | 22.76 | 50.39 | 137.54 | II    |
| 4.38      | 4.12      | 2.65 | 27.21 | 57.38 | 150.99 | III   |
| 3.65      | 3.47      | 2.24 | 24.71 | 53.45 | 143.42 | III   |
| 2.67      | 2.61      | 1.69 | 21.36 | 48.19 | 133.31 | II    |
| 4.14      | 3.90      | 2.51 | 26.39 | 56.09 | 148.50 | III   |
| 2.34      | 2.32      | 1.51 | 20.24 | 46.43 | 129.94 | II    |
| 3.98      | 3.76      | 2.42 | 25.84 | 55.23 | 146.85 | II    |
| 3.15      | 3.03      | 1.96 | 23.02 | 50.79 | 138.31 | II    |
| 3.76      | 3.56      | 2.30 | 25.07 | 54.02 | 144.52 | III   |
| 4.30      | 4.04      | 2.60 | 26.94 | 56.95 | 150.15 | III   |
| 3.27      | 3.14      | 2.03 | 23.41 | 51.41 | 139.52 | II    |
| 2.69      | 2.62      | 1.70 | 21.43 | 48.29 | 133.52 | II    |
| 4.56      | 4.27      | 2.75 | 27.82 | 58.34 | 152.84 | III   |
| 3.88      | 3.67      | 2.37 | 25.48 | 54.67 | 145.77 | II    |
| 2.85      | 2.77      | 1.79 | 21.99 | 49.18 | 135.22 | II    |
| 2.59      | 2.54      | 1.65 | 21.10 | 47.78 | 132.53 | II    |
| 2.86      | 2.77      | 1.80 | 22.00 | 49.20 | 135.25 | II    |
| 1.82      | 1.86      | 1.22 | 18.47 | 43.64 | 124.57 | II    |
| 2.63      | 2.58      | 1.67 | 21.24 | 47.99 | 132.94 | II    |
| 2.88      | 2.80      | 1.81 | 22.09 | 49.34 | 135.53 | II    |
| 3.96      | 3.74      | 2.41 | 25.76 | 55.10 | 146.60 | III   |
| 3.55      | 3.38      | 2.18 | 24.36 | 52.89 | 142.36 | II    |
| 2.95      | 2.86      | 1.85 | 22.33 | 49.70 | 136.23 | II    |
| 2.06      | 2.07      | 1.35 | 19.27 | 44.90 | 126.99 | I     |
| 1.51      | 1.58      | 1.04 | 17.39 | 41.95 | 121.33 | I     |
| 2.79      | 2.71      | 1.76 | 21.76 | 48.82 | 134.52 | II    |
| 2.32      | 2.30      | 1.49 | 20.16 | 46.30 | 129.68 | II    |
| 2.12      | 1.98      | 1.36 | 7.70  | 26.53 | 87.27  | I     |
| 2.11      | 3.12      | 2.14 | 12.17 | 32.95 | 97.92  | II    |
| 3.21      | 3.44      | 2.35 | 13.40 | 34.71 | 100.84 | II    |
| 3.51      | 2.92      | 2.00 | 11.37 | 31.80 | 96.01  | II    |
| 3.02      | 3.63      | 2.49 | 14.15 | 35.79 | 102.64 | II    |
| 3.70      | 2.90      | 1.98 | 11.28 | 31.67 | 95.80  | II    |
| 2.99      | 3.90      | 2.67 | 15.20 | 37.30 | 105.14 | II    |
| 3.96      | 3.74      | 2.56 | 14.57 | 36.39 | 103.63 | III   |
| 3.80      | 2.42      | 1.66 | 9.40  | 28.96 | 91.31  | II    |
| 2.53      | 1.72      | 1.18 | 6.69  | 25.07 | 84.85  | II    |

|      |      |      |       |       |        |     |
|------|------|------|-------|-------|--------|-----|
| 1.86 | 2.23 | 1.53 | 8.68  | 27.93 | 89.60  | II  |
| 2.35 | 3.27 | 2.24 | 12.72 | 33.74 | 99.24  | III |
| 3.35 | 2.84 | 1.95 | 11.06 | 31.35 | 95.26  | II  |
| 2.94 | 2.13 | 1.46 | 8.26  | 27.34 | 88.61  | III |
| 2.25 | 0.91 | 0.63 | 3.50  | 20.49 | 77.24  | II  |
| 1.08 | 3.65 | 2.50 | 14.22 | 35.89 | 102.80 | III |
| 3.72 | 3.67 | 2.51 | 14.31 | 36.02 | 103.02 | II  |
| 3.74 | 2.43 | 1.67 | 9.47  | 29.07 | 91.49  | II  |
| 2.55 | 1.43 | 0.99 | 5.55  | 23.44 | 82.15  | III |
| 1.58 | 3.13 | 2.15 | 12.21 | 33.00 | 98.01  | II  |
| 3.22 | 4.21 | 2.88 | 16.42 | 39.05 | 108.04 | III |
| 4.26 | 4.52 | 3.09 | 17.64 | 40.79 | 110.94 | II  |
| 4.56 | 2.21 | 1.52 | 8.61  | 27.83 | 89.43  | II  |
| 2.34 | 4.69 | 3.21 | 18.30 | 41.75 | 112.53 | III |
| 4.72 | 3.00 | 2.06 | 11.70 | 32.27 | 96.80  | II  |
| 3.10 | 2.82 | 1.93 | 10.97 | 31.23 | 95.07  | II  |
| 2.92 | 3.80 | 2.60 | 14.82 | 36.75 | 104.23 | II  |
| 3.86 | 2.84 | 1.95 | 11.06 | 31.34 | 95.26  | III |
| 2.94 | 3.63 | 2.48 | 14.14 | 35.78 | 102.61 | II  |
| 3.70 | 3.71 | 2.54 | 14.46 | 36.23 | 103.37 | III |
| 3.78 | 3.13 | 2.14 | 12.19 | 32.97 | 97.96  | II  |
| 3.22 | 2.92 | 2.00 | 11.37 | 31.80 | 96.01  | II  |
| 3.02 | 2.92 | 2.00 | 11.38 | 31.81 | 96.04  | III |
| 3.02 | 3.49 | 2.39 | 13.62 | 35.03 | 101.37 | II  |
| 3.57 | 3.27 | 2.24 | 12.76 | 33.79 | 99.33  | III |
| 3.36 | 2.68 | 1.84 | 10.43 | 30.44 | 93.76  | II  |
| 2.78 | 3.45 | 2.36 | 13.45 | 34.78 | 100.96 | II  |
| 3.53 | 2.64 | 1.81 | 10.29 | 30.24 | 93.43  | III |
| 2.64 | 2.40 | 2.43 | 14.85 | 53.57 | 104.30 | I   |
| 0.62 | 0.77 | 1.20 | 5.16  | 38.87 | 81.21  | I   |
| 2.40 | 2.20 | 2.29 | 25.86 | 51.81 | 145.88 | II  |
| 2.80 | 2.52 | 2.53 | 27.59 | 54.67 | 150.54 | II  |
| 2.16 | 2.01 | 2.14 | 24.78 | 50.03 | 142.97 | II  |
| 1.64 | 1.59 | 1.82 | 22.50 | 46.26 | 136.81 | II  |
| 1.60 | 1.56 | 1.79 | 22.32 | 45.97 | 136.34 | II  |
| 3.20 | 2.85 | 2.77 | 29.38 | 57.62 | 155.36 | II  |
| 1.27 | 1.29 | 1.59 | 20.86 | 43.55 | 132.39 | II  |
| 2.46 | 2.25 | 2.32 | 26.13 | 52.26 | 146.61 | II  |
| 2.32 | 2.14 | 2.24 | 25.52 | 51.24 | 144.96 | I   |
| 1.97 | 1.86 | 2.02 | 23.97 | 48.69 | 140.78 | II  |
| 0.75 | 0.87 | 1.27 | 18.59 | 39.80 | 126.28 | II  |
| 2.91 | 2.61 | 2.60 | 28.10 | 55.51 | 151.91 | II  |
| 1.43 | 1.42 | 1.69 | 21.59 | 44.76 | 134.36 | II  |
| 2.17 | 2.01 | 2.14 | 24.83 | 50.10 | 143.09 | III |
| 0.34 | 0.54 | 1.02 | 16.76 | 36.79 | 121.37 | II  |
| 2.41 | 2.21 | 2.29 | 25.91 | 51.89 | 146.02 | II  |
| 3.38 | 2.99 | 2.88 | 30.16 | 58.91 | 157.47 | II  |

|      |      |      |       |       |        |     |
|------|------|------|-------|-------|--------|-----|
| 2.01 | 1.88 | 2.04 | 24.12 | 48.93 | 141.18 | III |
| 1.76 | 1.69 | 1.89 | 23.05 | 47.17 | 138.31 | II  |
| 3.07 | 2.75 | 2.70 | 28.82 | 56.69 | 153.85 | II  |
| 2.63 | 2.39 | 2.42 | 26.86 | 53.46 | 148.58 | III |
| 2.52 | 2.30 | 2.35 | 26.36 | 52.63 | 147.22 | II  |
| 1.99 | 1.88 | 2.04 | 24.07 | 48.85 | 141.05 | II  |
| 2.13 | 1.98 | 2.12 | 24.66 | 49.82 | 142.64 | II  |
| 2.68 | 2.43 | 2.46 | 27.08 | 53.83 | 149.18 | III |
| 1.60 | 1.56 | 1.79 | 22.32 | 45.96 | 136.33 | II  |
| 2.68 | 2.43 | 2.46 | 27.10 | 53.86 | 149.22 | II  |
| 2.10 | 1.96 | 2.10 | 24.54 | 49.63 | 142.32 | II  |
| 2.12 | 1.98 | 2.11 | 24.62 | 49.76 | 142.53 | III |
| 1.62 | 1.58 | 1.81 | 22.43 | 46.14 | 136.62 | II  |
| 1.82 | 1.73 | 1.93 | 23.29 | 47.57 | 138.96 | III |
| 2.82 | 2.54 | 2.54 | 27.71 | 54.85 | 150.85 | II  |
| 0.32 | 0.52 | 1.01 | 16.68 | 36.66 | 121.15 | III |
| 1.66 | 1.61 | 1.83 | 22.61 | 46.44 | 137.12 | II  |
| 1.98 | 1.87 | 2.03 | 24.02 | 48.77 | 140.91 | II  |
| 1.63 | 1.59 | 1.82 | 22.48 | 46.23 | 136.77 | III |
| 2.71 | 2.47 | 2.59 | 15.28 | 38.38 | 102.13 | II  |
| 1.32 | 1.17 | 1.47 | 9.06  | 26.57 | 87.32  | II  |
| 1.70 | 1.52 | 1.77 | 10.76 | 29.79 | 91.36  | II  |
| 3.43 | 3.15 | 3.17 | 18.48 | 44.44 | 109.74 | II  |
| 2.00 | 1.80 | 2.02 | 12.09 | 32.33 | 94.54  | II  |
| 2.00 | 1.81 | 2.02 | 12.10 | 32.35 | 94.57  | I   |
| 2.41 | 2.19 | 2.35 | 13.94 | 35.83 | 98.93  | II  |
| 2.46 | 2.24 | 2.39 | 14.17 | 36.27 | 99.49  | II  |
| 2.72 | 2.48 | 2.60 | 15.29 | 38.40 | 102.16 | II  |
| 2.10 | 1.90 | 2.10 | 12.56 | 33.22 | 95.66  | III |
| 3.03 | 2.77 | 2.85 | 16.67 | 41.02 | 105.45 | II  |
| 3.16 | 2.89 | 2.96 | 17.27 | 42.15 | 106.87 | III |
| 1.00 | 0.87 | 1.21 | 7.66  | 23.92 | 83.98  | II  |
| 3.05 | 2.79 | 2.87 | 16.77 | 41.21 | 105.69 | III |
| 3.16 | 2.89 | 2.95 | 17.26 | 42.12 | 106.83 | II  |
| 2.24 | 2.03 | 2.21 | 13.18 | 34.39 | 97.13  | II  |
| 2.43 | 2.21 | 2.36 | 14.01 | 35.96 | 99.10  | III |
| 2.48 | 2.26 | 2.41 | 14.25 | 36.41 | 99.67  | II  |
| 2.20 | 1.99 | 2.18 | 12.97 | 33.99 | 96.63  | II  |
| 1.56 | 1.39 | 1.66 | 10.13 | 28.60 | 89.86  | III |
| 1.39 | 1.23 | 1.52 | 9.37  | 27.16 | 88.05  | III |
| 1.44 | 1.28 | 1.56 | 9.59  | 27.58 | 88.58  | II  |
| 1.64 | 1.47 | 1.73 | 10.49 | 29.29 | 90.72  | III |
| 2.34 | 2.12 | 2.29 | 13.60 | 35.19 | 98.13  | II  |
| 1.84 | 1.65 | 1.89 | 11.37 | 30.96 | 92.83  | III |
| 2.36 | 2.14 | 2.31 | 13.70 | 35.39 | 98.38  | II  |
| 1.90 | 1.71 | 1.94 | 11.65 | 31.48 | 93.48  | II  |
| 1.59 | 1.42 | 1.69 | 10.28 | 28.90 | 90.24  | III |

|      |      |      |       |       |        |     |
|------|------|------|-------|-------|--------|-----|
| 1.83 | 1.65 | 1.88 | 11.34 | 30.89 | 92.74  | II  |
| 1.63 | 1.46 | 1.72 | 10.44 | 29.19 | 90.60  | III |
| 2.02 | 1.83 | 2.04 | 12.21 | 32.55 | 94.82  | II  |
| 2.44 | 2.22 | 2.38 | 14.07 | 36.08 | 99.26  | III |
| 1.73 | 1.56 | 1.80 | 10.92 | 30.09 | 91.74  | II  |
| 1.40 | 1.24 | 1.53 | 9.42  | 27.26 | 88.18  | III |
| 3.29 | 3.01 | 3.06 | 17.83 | 43.22 | 108.21 | II  |
| 2.26 | 2.05 | 2.23 | 13.25 | 34.53 | 97.30  | III |
| 2.71 | 2.47 | 2.59 | 15.27 | 38.35 | 102.09 | II  |



| 术前动态 | 术前静态 | HSS | 术后6小时静 | 术后12小时静 | 术后24h静 | 术后48h静 | 术后6h动态 |
|------|------|-----|--------|---------|--------|--------|--------|
| 8    | 8    | 48  | 5      | 5       | 5      | 3      | 8      |
| 6    | 6    | 48  | 3      | 3       | 3      | 2      | 6      |
| 7    | 7    | 39  | 4      | 4       | 4      | 2      | 7      |
| 5    | 5    | 43  | 3      | 3       | 3      | 1      | 6      |
| 7    | 7    | 36  | 5      | 5       | 4      | 3      | 8      |
| 7    | 7    | 46  | 4      | 4       | 4      | 2      | 7      |
| 5    | 5    | 43  | 3      | 3       | 3      | 1      | 6      |
| 4    | 4    | 37  | 2      | 3       | 2      | 1      | 5      |
| 8    | 8    | 34  | 5      | 5       | 5      | 4      | 9      |
| 6    | 6    | 50  | 4      | 4       | 4      | 2      | 7      |
| 8    | 8    | 41  | 5      | 5       | 5      | 3      | 8      |
| 7    | 7    | 48  | 4      | 4       | 4      | 3      | 7      |
| 5    | 5    | 44  | 3      | 3       | 3      | 2      | 6      |
| 7    | 7    | 39  | 5      | 5       | 4      | 3      | 8      |
| 5    | 5    | 46  | 3      | 3       | 3      | 1      | 6      |
| 7    | 7    | 37  | 5      | 4       | 4      | 3      | 8      |
| 6    | 6    | 45  | 4      | 4       | 4      | 2      | 7      |
| 7    | 7    | 41  | 4      | 4       | 4      | 3      | 8      |
| 8    | 8    | 44  | 5      | 5       | 5      | 3      | 8      |
| 6    | 6    | 47  | 4      | 4       | 4      | 2      | 7      |
| 6    | 6    | 42  | 3      | 3       | 3      | 2      | 6      |
| 8    | 8    | 39  | 5      | 5       | 5      | 4      | 9      |
| 7    | 7    | 49  | 5      | 4       | 4      | 3      | 8      |
| 6    | 6    | 45  | 3      | 3       | 3      | 2      | 6      |
| 5    | 5    | 40  | 3      | 3       | 3      | 2      | 6      |
| 6    | 6    | 38  | 3      | 3       | 3      | 2      | 6      |
| 4    | 4    | 40  | 2      | 3       | 2      | 1      | 5      |
| 5    | 5    | 34  | 3      | 3       | 3      | 2      | 6      |
| 6    | 6    | 38  | 4      | 3       | 3      | 2      | 7      |
| 7    | 7    | 40  | 5      | 4       | 4      | 3      | 8      |
| 7    | 7    | 45  | 4      | 4       | 4      | 3      | 7      |
| 6    | 6    | 43  | 4      | 4       | 3      | 2      | 7      |
| 5    | 5    | 40  | 3      | 3       | 3      | 1      | 5      |
| 4    | 4    | 35  | 2      | 2       | 2      | 0      | 5      |
| 6    | 6    | 33  | 3      | 3       | 3      | 2      | 6      |
| 5    | 5    | 39  | 3      | 3       | 3      | 1      | 6      |
| 5    | 5    | 37  | 2      | 1       | 1      | 1      | 5      |
| 7    | 7    | 36  | 3      | 2       | 2      | 2      | 6      |
| 7    | 7    | 41  | 3      | 3       | 2      | 2      | 7      |
| 6    | 6    | 42  | 3      | 2       | 2      | 2      | 6      |
| 7    | 7    | 40  | 3      | 3       | 3      | 3      | 7      |
| 6    | 6    | 43  | 2      | 2       | 2      | 2      | 6      |
| 8    | 8    | 40  | 3      | 3       | 3      | 3      | 7      |
| 7    | 7    | 44  | 3      | 3       | 3      | 3      | 7      |
| 6    | 6    | 44  | 2      | 2       | 1      | 1      | 5      |
| 5    | 5    | 38  | 1      | 1       | 1      | 0      | 4      |

|   |   |    |   |   |   |   |   |
|---|---|----|---|---|---|---|---|
| 5 | 5 | 34 | 2 | 2 | 1 | 1 | 5 |
| 7 | 7 | 37 | 3 | 2 | 2 | 2 | 6 |
| 6 | 6 | 41 | 2 | 2 | 2 | 2 | 6 |
| 5 | 5 | 39 | 2 | 2 | 1 | 1 | 5 |
| 4 | 4 | 36 | 1 | 1 | 0 | 1 | 3 |
| 7 | 7 | 31 | 3 | 3 | 3 | 3 | 7 |
| 7 | 7 | 43 | 3 | 3 | 3 | 3 | 7 |
| 6 | 6 | 43 | 2 | 2 | 1 | 1 | 5 |
| 4 | 4 | 38 | 1 | 1 | 0 | 0 | 4 |
| 7 | 7 | 33 | 3 | 2 | 2 | 2 | 6 |
| 8 | 8 | 41 | 4 | 3 | 3 | 3 | 8 |
| 8 | 8 | 46 | 4 | 4 | 4 | 4 | 8 |
| 5 | 5 | 47 | 2 | 2 | 1 | 1 | 5 |
| 9 | 9 | 37 | 4 | 4 | 4 | 4 | 8 |
| 6 | 6 | 48 | 3 | 2 | 2 | 2 | 6 |
| 6 | 6 | 40 | 2 | 2 | 2 | 2 | 6 |
| 7 | 7 | 39 | 3 | 3 | 3 | 3 | 7 |
| 6 | 6 | 44 | 2 | 2 | 2 | 2 | 6 |
| 7 | 7 | 39 | 3 | 3 | 3 | 3 | 7 |
| 7 | 7 | 43 | 3 | 3 | 3 | 3 | 7 |
| 7 | 7 | 44 | 3 | 2 | 2 | 2 | 6 |
| 6 | 6 | 41 | 3 | 2 | 2 | 2 | 6 |
| 6 | 6 | 40 | 3 | 2 | 2 | 2 | 6 |
| 7 | 7 | 40 | 3 | 3 | 3 | 2 | 7 |
| 7 | 7 | 43 | 3 | 2 | 2 | 2 | 6 |
| 6 | 6 | 42 | 2 | 2 | 2 | 1 | 6 |
| 7 | 7 | 39 | 3 | 3 | 2 | 2 | 7 |
| 6 | 6 | 42 | 2 | 2 | 2 | 1 | 5 |
| 8 | 8 | 39 | 4 | 4 | 4 | 3 | 7 |
| 4 | 4 | 44 | 1 | 1 | 1 | 0 | 4 |
| 7 | 7 | 31 | 4 | 3 | 3 | 2 | 7 |
| 8 | 8 | 42 | 4 | 4 | 4 | 3 | 7 |
| 7 | 7 | 44 | 3 | 3 | 3 | 2 | 6 |
| 6 | 6 | 40 | 3 | 2 | 2 | 2 | 6 |
| 6 | 6 | 37 | 3 | 2 | 2 | 1 | 5 |
| 9 | 9 | 37 | 5 | 4 | 4 | 3 | 8 |
| 5 | 5 | 47 | 2 | 2 | 2 | 1 | 5 |
| 7 | 7 | 35 | 4 | 3 | 3 | 2 | 7 |
| 7 | 7 | 42 | 3 | 3 | 3 | 2 | 7 |
| 7 | 7 | 41 | 3 | 3 | 3 | 2 | 6 |
| 5 | 5 | 39 | 1 | 2 | 1 | 0 | 4 |
| 8 | 8 | 32 | 4 | 4 | 4 | 3 | 8 |
| 6 | 6 | 45 | 2 | 2 | 2 | 1 | 5 |
| 7 | 7 | 36 | 3 | 3 | 3 | 2 | 6 |
| 4 | 4 | 40 | 1 | 1 | 1 | 0 | 3 |
| 7 | 7 | 29 | 4 | 3 | 3 | 2 | 7 |
| 9 | 9 | 42 | 5 | 4 | 5 | 4 | 8 |

|   |   |    |   |   |   |   |   |
|---|---|----|---|---|---|---|---|
| 7 | 7 | 48 | 3 | 3 | 3 | 2 | 6 |
| 6 | 6 | 39 | 3 | 3 | 3 | 2 | 6 |
| 8 | 8 | 38 | 4 | 4 | 4 | 3 | 8 |
| 8 | 8 | 46 | 4 | 4 | 4 | 3 | 7 |
| 7 | 7 | 43 | 4 | 3 | 4 | 3 | 7 |
| 7 | 7 | 42 | 3 | 3 | 3 | 2 | 6 |
| 7 | 7 | 39 | 3 | 3 | 3 | 2 | 6 |
| 8 | 8 | 40 | 4 | 4 | 4 | 3 | 7 |
| 6 | 6 | 43 | 3 | 2 | 2 | 1 | 5 |
| 8 | 8 | 37 | 4 | 4 | 4 | 3 | 7 |
| 7 | 7 | 43 | 3 | 3 | 3 | 2 | 6 |
| 7 | 7 | 40 | 3 | 3 | 3 | 2 | 6 |
| 6 | 6 | 40 | 3 | 2 | 2 | 2 | 6 |
| 6 | 6 | 37 | 3 | 3 | 3 | 2 | 6 |
| 8 | 8 | 38 | 4 | 4 | 4 | 3 | 7 |
| 4 | 4 | 44 | 1 | 1 | 1 | 0 | 3 |
| 6 | 6 | 29 | 3 | 3 | 2 | 2 | 6 |
| 7 | 7 | 37 | 3 | 3 | 3 | 2 | 6 |
| 6 | 6 | 39 | 3 | 2 | 2 | 2 | 6 |
| 7 | 7 | 37 | 3 | 2 | 2 | 2 | 6 |
| 5 | 5 | 43 | 1 | 1 | 1 | 1 | 4 |
| 5 | 5 | 33 | 1 | 1 | 1 | 1 | 5 |
| 9 | 9 | 36 | 4 | 3 | 3 | 3 | 7 |
| 6 | 6 | 48 | 2 | 2 | 1 | 1 | 5 |
| 6 | 6 | 38 | 2 | 2 | 1 | 1 | 5 |
| 7 | 7 | 38 | 2 | 2 | 2 | 2 | 6 |
| 7 | 7 | 41 | 2 | 2 | 2 | 2 | 6 |
| 7 | 7 | 41 | 3 | 2 | 2 | 2 | 6 |
| 6 | 6 | 43 | 2 | 2 | 2 | 2 | 5 |
| 8 | 8 | 39 | 3 | 3 | 3 | 3 | 7 |
| 8 | 8 | 45 | 3 | 3 | 3 | 3 | 7 |
| 4 | 4 | 46 | 0 | 1 | 0 | 0 | 3 |
| 8 | 8 | 31 | 3 | 3 | 3 | 3 | 7 |
| 8 | 8 | 45 | 3 | 3 | 3 | 3 | 7 |
| 6 | 6 | 46 | 2 | 2 | 2 | 2 | 5 |
| 7 | 7 | 40 | 2 | 2 | 2 | 2 | 6 |
| 7 | 7 | 41 | 2 | 2 | 2 | 2 | 6 |
| 6 | 6 | 41 | 2 | 2 | 2 | 2 | 5 |
| 5 | 5 | 39 | 1 | 1 | 1 | 1 | 4 |
| 5 | 5 | 35 | 1 | 1 | 1 | 1 | 4 |
| 5 | 5 | 34 | 1 | 1 | 1 | 1 | 4 |
| 5 | 5 | 34 | 1 | 1 | 1 | 1 | 4 |
| 7 | 7 | 36 | 2 | 2 | 2 | 2 | 6 |
| 6 | 6 | 40 | 2 | 2 | 1 | 1 | 5 |
| 7 | 7 | 37 | 2 | 2 | 2 | 2 | 6 |
| 6 | 6 | 41 | 2 | 2 | 1 | 1 | 5 |
| 5 | 5 | 37 | 1 | 1 | 1 | 1 | 4 |

|   |   |    |   |   |   |   |   |
|---|---|----|---|---|---|---|---|
| 6 | 6 | 35 | 2 | 2 | 1 | 1 | 5 |
| 5 | 5 | 37 | 1 | 1 | 1 | 1 | 4 |
| 6 | 6 | 35 | 2 | 2 | 1 | 2 | 5 |
| 7 | 7 | 38 | 2 | 2 | 2 | 2 | 6 |
| 6 | 6 | 41 | 1 | 1 | 1 | 1 | 5 |
| 5 | 5 | 36 | 1 | 1 | 1 | 1 | 4 |
| 8 | 8 | 34 | 4 | 3 | 3 | 3 | 7 |
| 7 | 7 | 47 | 2 | 2 | 2 | 2 | 5 |
| 7 | 7 | 40 | 3 | 2 | 2 | 2 | 6 |

| 术后12h动 | 术后24h动 | 术后48h动 | 6h芬太尼  | 12h芬太尼 | 24h芬太尼 | 48h芬太尼  | 第一次直腿打 |
|--------|--------|--------|--------|--------|--------|---------|--------|
| 8      | 8      | 4      | 278.94 | 426.50 | 610.22 | 960.68  | 26.79  |
| 6      | 5      | 3      | 183.32 | 264.53 | 394.50 | 681.88  | 20.47  |
| 7      | 6      | 3      | 221.55 | 329.29 | 480.74 | 793.35  | 23.00  |
| 6      | 4      | 2      | 145.09 | 199.77 | 308.25 | 570.41  | 17.94  |
| 8      | 7      | 4      | 261.47 | 396.91 | 570.80 | 909.73  | 25.63  |
| 7      | 6      | 3      | 220.68 | 327.83 | 478.79 | 790.83  | 22.94  |
| 6      | 4      | 2      | 153.23 | 213.57 | 326.62 | 594.16  | 18.48  |
| 5      | 3      | 2      | 119.61 | 156.63 | 250.78 | 496.14  | 16.26  |
| 9      | 8      | 5      | 302.37 | 466.19 | 663.07 | 1028.99 | 28.34  |
| 7      | 6      | 3      | 198.61 | 290.43 | 428.99 | 726.46  | 21.48  |
| 8      | 8      | 4      | 278.39 | 425.57 | 608.98 | 959.08  | 26.75  |
| 7      | 6      | 3      | 233.47 | 349.49 | 507.65 | 828.12  | 23.79  |
| 6      | 5      | 2      | 173.48 | 247.87 | 372.30 | 653.19  | 19.82  |
| 8      | 7      | 4      | 263.61 | 400.55 | 575.64 | 916.00  | 25.78  |
| 6      | 4      | 2      | 153.48 | 213.99 | 327.18 | 594.88  | 18.50  |
| 8      | 7      | 4      | 253.83 | 383.97 | 553.57 | 887.46  | 25.13  |
| 7      | 6      | 3      | 203.16 | 298.15 | 439.27 | 739.74  | 21.78  |
| 8      | 7      | 4      | 240.03 | 360.59 | 522.44 | 847.23  | 24.22  |
| 8      | 7      | 4      | 273.42 | 417.15 | 597.75 | 944.57  | 26.42  |
| 7      | 6      | 3      | 210.31 | 310.25 | 455.39 | 760.57  | 22.25  |
| 6      | 5      | 2      | 174.70 | 249.93 | 375.05 | 656.74  | 19.90  |
| 9      | 8      | 4      | 289.36 | 444.16 | 633.73 | 991.07  | 27.48  |
| 8      | 7      | 4      | 247.41 | 373.10 | 539.09 | 868.75  | 24.71  |
| 6      | 5      | 3      | 184.84 | 267.11 | 397.93 | 686.32  | 20.57  |
| 6      | 5      | 2      | 168.85 | 240.02 | 361.85 | 639.69  | 19.51  |
| 6      | 5      | 3      | 185.02 | 267.41 | 398.33 | 686.84  | 20.58  |
| 5      | 4      | 2      | 121.63 | 160.04 | 255.32 | 502.01  | 16.39  |
| 6      | 5      | 2      | 171.26 | 244.11 | 367.30 | 646.73  | 19.67  |
| 6      | 5      | 3      | 186.64 | 270.16 | 401.99 | 691.56  | 20.69  |
| 8      | 7      | 4      | 252.33 | 381.43 | 550.18 | 883.09  | 25.03  |
| 7      | 6      | 3      | 227.19 | 338.85 | 493.48 | 809.80  | 23.37  |
| 7      | 5      | 3      | 190.80 | 277.21 | 411.38 | 703.70  | 20.97  |
| 5      | 4      | 2      | 135.98 | 184.35 | 287.71 | 543.87  | 17.34  |
| 5      | 3      | 1      | 102.38 | 127.43 | 211.89 | 445.88  | 15.12  |
| 6      | 5      | 3      | 180.68 | 260.07 | 388.55 | 674.20  | 20.30  |
| 5      | 4      | 2      | 151.96 | 211.42 | 323.75 | 590.45  | 18.40  |
| 4      | 3      | 2      | 92.31  | 126.52 | 306.83 | 454.17  | 17.73  |
| 6      | 5      | 3      | 157.98 | 224.36 | 283.75 | 637.95  | 20.62  |
| 6      | 5      | 3      | 175.98 | 251.17 | 416.99 | 688.32  | 21.42  |
| 6      | 4      | 3      | 146.20 | 206.81 | 453.51 | 604.99  | 20.10  |
| 6      | 5      | 3      | 187.03 | 267.64 | 393.09 | 719.26  | 21.90  |
| 6      | 4      | 3      | 144.89 | 204.86 | 475.93 | 601.32  | 20.04  |
| 7      | 6      | 4      | 202.44 | 290.60 | 390.43 | 762.39  | 22.58  |
| 7      | 6      | 3      | 193.14 | 276.74 | 507.21 | 736.36  | 22.17  |
| 5      | 4      | 2      | 117.22 | 163.63 | 488.34 | 523.88  | 18.82  |
| 4      | 3      | 1      | 77.43  | 104.36 | 334.29 | 412.53  | 17.07  |

|   |   |   |        |        |        |        |       |
|---|---|---|--------|--------|--------|--------|-------|
| 5 | 4 | 2 | 106.68 | 147.94 | 253.56 | 494.40 | 18.36 |
| 6 | 5 | 3 | 166.08 | 236.42 | 312.92 | 660.62 | 20.98 |
| 5 | 4 | 3 | 141.58 | 199.93 | 433.43 | 592.06 | 19.90 |
| 5 | 3 | 2 | 100.57 | 138.83 | 383.72 | 477.28 | 18.09 |
| 3 | 2 | 1 | 30.52  | 34.49  | 300.51 | 281.27 | 15.00 |
| 6 | 5 | 3 | 188.03 | 269.13 | 158.40 | 722.06 | 21.95 |
| 7 | 6 | 3 | 189.38 | 271.14 | 477.97 | 725.83 | 22.01 |
| 5 | 4 | 2 | 118.33 | 165.30 | 480.70 | 527.01 | 18.87 |
| 4 | 2 | 1 | 60.76  | 79.52  | 336.56 | 365.88 | 16.33 |
| 6 | 5 | 3 | 158.53 | 225.18 | 219.74 | 639.49 | 20.65 |
| 7 | 6 | 4 | 220.36 | 317.28 | 418.11 | 812.52 | 23.37 |
| 8 | 7 | 4 | 238.22 | 343.89 | 543.55 | 862.51 | 24.16 |
| 5 | 4 | 2 | 105.63 | 146.36 | 579.79 | 491.44 | 18.31 |
| 8 | 7 | 4 | 248.03 | 358.50 | 310.77 | 889.96 | 24.59 |
| 6 | 5 | 3 | 151.05 | 214.04 | 599.69 | 618.57 | 20.32 |
| 5 | 4 | 3 | 140.37 | 198.13 | 402.94 | 588.67 | 19.85 |
| 7 | 6 | 3 | 196.86 | 282.28 | 381.27 | 746.77 | 22.34 |
| 5 | 4 | 3 | 141.57 | 199.91 | 495.88 | 592.03 | 19.90 |
| 6 | 5 | 3 | 186.89 | 267.42 | 383.70 | 718.86 | 21.90 |
| 7 | 6 | 3 | 191.56 | 274.39 | 475.64 | 731.94 | 22.10 |
| 6 | 5 | 3 | 158.22 | 224.72 | 485.13 | 638.63 | 20.63 |
| 6 | 4 | 3 | 146.18 | 206.78 | 417.48 | 604.94 | 20.10 |
| 6 | 4 | 3 | 146.36 | 207.05 | 393.06 | 605.43 | 20.11 |
| 6 | 5 | 3 | 179.23 | 256.02 | 393.41 | 697.43 | 21.56 |
| 6 | 5 | 3 | 166.62 | 237.23 | 460.11 | 662.13 | 21.00 |
| 5 | 4 | 2 | 132.34 | 186.16 | 434.52 | 566.20 | 19.49 |
| 6 | 5 | 3 | 176.71 | 252.26 | 364.97 | 690.38 | 21.45 |
| 5 | 4 | 2 | 130.29 | 183.11 | 455.00 | 560.46 | 19.40 |
| 7 | 6 | 4 | 198.07 | 304.76 | 495.30 | 731.85 | 22.73 |
| 4 | 2 | 1 | 66.69  | 97.30  | 189.44 | 361.56 | 14.03 |
| 6 | 5 | 3 | 182.32 | 279.89 | 458.63 | 687.46 | 21.68 |
| 7 | 6 | 4 | 207.85 | 320.21 | 518.07 | 759.42 | 23.37 |
| 6 | 5 | 3 | 166.36 | 254.69 | 421.48 | 642.48 | 20.63 |
| 5 | 4 | 2 | 132.68 | 201.49 | 343.05 | 547.53 | 18.40 |
| 5 | 4 | 2 | 130.09 | 197.42 | 337.05 | 540.26 | 18.23 |
| 8 | 6 | 4 | 234.20 | 361.82 | 579.42 | 833.69 | 25.12 |
| 5 | 3 | 2 | 108.48 | 163.28 | 286.71 | 479.32 | 16.80 |
| 7 | 5 | 3 | 186.32 | 286.20 | 467.94 | 698.72 | 21.95 |
| 7 | 5 | 3 | 177.26 | 271.89 | 446.84 | 673.19 | 21.35 |
| 6 | 5 | 3 | 154.39 | 235.79 | 393.61 | 608.74 | 19.84 |
| 4 | 3 | 1 | 75.00  | 110.42 | 208.79 | 384.98 | 14.58 |
| 8 | 6 | 4 | 215.36 | 332.06 | 535.55 | 780.58 | 23.87 |
| 5 | 4 | 2 | 119.25 | 180.29 | 311.81 | 509.70 | 17.51 |
| 6 | 5 | 3 | 167.04 | 255.75 | 423.05 | 644.38 | 20.67 |
| 3 | 2 | 1 | 48.09  | 67.92  | 146.14 | 309.14 | 12.80 |
| 7 | 5 | 3 | 183.06 | 281.06 | 460.36 | 689.56 | 21.73 |
| 8 | 7 | 4 | 245.76 | 380.07 | 606.33 | 866.27 | 25.88 |

|   |   |   |        |        |        |        |       |
|---|---|---|--------|--------|--------|--------|-------|
| 6 | 5 | 3 | 156.58 | 239.25 | 398.72 | 614.92 | 19.98 |
| 6 | 4 | 2 | 140.85 | 214.40 | 362.08 | 570.57 | 18.94 |
| 8 | 6 | 4 | 225.94 | 348.76 | 560.17 | 810.39 | 24.57 |
| 7 | 6 | 4 | 197.10 | 303.23 | 493.05 | 729.12 | 22.66 |
| 7 | 5 | 3 | 189.67 | 291.49 | 475.73 | 708.16 | 22.17 |
| 6 | 5 | 3 | 155.85 | 238.09 | 397.02 | 612.86 | 19.93 |
| 6 | 5 | 3 | 164.56 | 251.84 | 417.27 | 637.39 | 20.51 |
| 7 | 6 | 4 | 200.37 | 308.39 | 500.65 | 738.32 | 22.88 |
| 5 | 4 | 2 | 130.05 | 197.35 | 336.95 | 540.14 | 18.23 |
| 7 | 6 | 4 | 200.60 | 308.75 | 501.18 | 738.97 | 22.89 |
| 6 | 5 | 3 | 162.82 | 249.09 | 413.23 | 632.50 | 20.39 |
| 6 | 5 | 3 | 163.99 | 250.95 | 415.96 | 635.80 | 20.47 |
| 5 | 4 | 2 | 131.64 | 199.85 | 340.64 | 544.61 | 18.33 |
| 6 | 4 | 3 | 144.43 | 220.06 | 370.43 | 580.67 | 19.18 |
| 7 | 6 | 4 | 209.53 | 322.85 | 521.97 | 764.14 | 23.48 |
| 3 | 2 | 1 | 46.90  | 66.04  | 143.36 | 305.77 | 12.72 |
| 5 | 4 | 2 | 134.35 | 204.13 | 346.95 | 552.25 | 18.51 |
| 6 | 5 | 3 | 155.12 | 236.94 | 395.31 | 610.80 | 19.89 |
| 5 | 4 | 2 | 132.43 | 201.10 | 342.48 | 546.84 | 18.38 |
| 5 | 4 | 3 | 159.62 | 190.76 | 358.60 | 586.63 | 19.78 |
| 3 | 2 | 1 | 49.91  | 80.02  | 198.75 | 338.13 | 15.02 |
| 4 | 3 | 2 | 79.85  | 110.24 | 242.38 | 405.95 | 16.32 |
| 7 | 5 | 4 | 215.96 | 247.64 | 440.69 | 714.24 | 22.22 |
| 4 | 3 | 2 | 103.39 | 134.00 | 276.68 | 459.27 | 17.34 |
| 4 | 3 | 2 | 103.60 | 134.21 | 276.97 | 459.73 | 17.35 |
| 5 | 4 | 3 | 135.92 | 166.84 | 324.06 | 532.93 | 18.75 |
| 5 | 4 | 3 | 140.05 | 171.01 | 330.08 | 542.29 | 18.93 |
| 5 | 4 | 3 | 159.82 | 190.97 | 358.89 | 587.08 | 19.79 |
| 4 | 3 | 2 | 111.71 | 142.40 | 288.80 | 478.12 | 17.70 |
| 6 | 5 | 4 | 184.16 | 215.54 | 394.36 | 642.22 | 20.84 |
| 6 | 5 | 4 | 194.67 | 226.14 | 409.67 | 666.01 | 21.30 |
| 2 | 2 | 1 | 25.23  | 55.10  | 162.79 | 282.23 | 13.95 |
| 6 | 5 | 4 | 185.95 | 217.34 | 396.96 | 646.25 | 20.92 |
| 6 | 5 | 4 | 194.42 | 225.90 | 409.31 | 665.46 | 21.29 |
| 5 | 4 | 2 | 122.55 | 153.34 | 304.59 | 502.66 | 18.17 |
| 5 | 4 | 3 | 137.18 | 168.11 | 325.90 | 535.80 | 18.80 |
| 5 | 4 | 3 | 141.37 | 172.34 | 332.01 | 545.30 | 18.99 |
| 5 | 3 | 2 | 118.89 | 149.65 | 299.26 | 494.38 | 18.01 |
| 3 | 2 | 1 | 68.77  | 99.05  | 226.23 | 380.84 | 15.84 |
| 3 | 2 | 1 | 55.36  | 85.52  | 206.70 | 350.48 | 15.25 |
| 3 | 2 | 1 | 59.29  | 89.48  | 212.42 | 359.37 | 15.42 |
| 4 | 3 | 1 | 75.14  | 105.48 | 235.51 | 395.28 | 16.11 |
| 5 | 4 | 2 | 129.96 | 160.82 | 315.39 | 519.45 | 18.49 |
| 4 | 3 | 2 | 90.71  | 121.20 | 258.20 | 430.55 | 16.79 |
| 5 | 4 | 3 | 131.82 | 162.70 | 318.10 | 523.66 | 18.57 |
| 4 | 3 | 2 | 95.54  | 126.07 | 265.23 | 441.48 | 17.00 |
| 3 | 3 | 1 | 71.53  | 101.84 | 230.25 | 387.10 | 15.96 |

|   |   |   |        |        |        |        |       |
|---|---|---|--------|--------|--------|--------|-------|
| 4 | 3 | 2 | 90.08  | 120.56 | 257.28 | 429.11 | 16.76 |
| 4 | 3 | 1 | 74.24  | 104.57 | 234.20 | 393.23 | 16.07 |
| 4 | 3 | 2 | 105.44 | 136.07 | 279.67 | 463.92 | 17.43 |
| 5 | 4 | 3 | 138.32 | 169.27 | 327.57 | 538.39 | 18.85 |
| 4 | 3 | 2 | 82.64  | 113.05 | 246.44 | 412.26 | 16.44 |
| 3 | 2 | 1 | 56.30  | 86.47  | 208.07 | 352.61 | 15.29 |
| 7 | 5 | 4 | 204.63 | 236.21 | 424.19 | 688.59 | 21.73 |
| 5 | 4 | 2 | 123.85 | 154.66 | 306.49 | 505.62 | 18.23 |
| 5 | 4 | 3 | 159.34 | 190.48 | 358.19 | 585.99 | 19.77 |



| 第一次抢救术后24hROM | 术后48hROM | 术后72hROM | PONV  | 过度镇静 | 晕眩 | 尿潴留 |   |
|---------------|----------|----------|-------|------|----|-----|---|
| 102.56        | 56.54    | 70.00    | 83.25 | 0    | 0  | 0   | 0 |
| 85.81         | 43.94    | 54.63    | 67.99 | 0    | 0  | 0   | 0 |
| 92.51         | 48.98    | 60.78    | 74.09 | 0    | 0  | 0   | 1 |
| 79.12         | 38.90    | 48.49    | 61.89 | 0    | 0  | 0   | 0 |
| 99.50         | 54.24    | 67.19    | 80.46 | 0    | 0  | 1   | 0 |
| 92.36         | 48.86    | 60.64    | 73.96 | 0    | 0  | 0   | 0 |
| 80.54         | 39.98    | 49.80    | 63.19 | 1    | 0  | 0   | 0 |
| 74.66         | 35.55    | 44.39    | 57.83 | 0    | 0  | 0   | 0 |
| 106.66        | 59.63    | 73.77    | 86.99 | 1    | 0  | 0   | 0 |
| 88.49         | 45.96    | 57.09    | 70.43 | 0    | 0  | 0   | 0 |
| 102.46        | 56.47    | 69.92    | 83.16 | 1    | 0  | 0   | 0 |
| 94.60         | 50.55    | 62.70    | 76.00 | 0    | 0  | 0   | 0 |
| 84.09         | 42.64    | 53.05    | 66.42 | 0    | 0  | 0   | 0 |
| 99.87         | 54.52    | 67.54    | 80.81 | 1    | 0  | 0   | 0 |
| 80.59         | 40.01    | 49.84    | 63.23 | 0    | 0  | 0   | 0 |
| 98.16         | 53.23    | 65.97    | 79.24 | 1    | 0  | 0   | 0 |
| 89.29         | 46.56    | 57.82    | 71.16 | 0    | 0  | 0   | 0 |
| 95.74         | 51.41    | 63.75    | 77.04 | 1    | 0  | 0   | 0 |
| 101.59        | 55.81    | 69.12    | 82.37 | 0    | 0  | 0   | 0 |
| 90.54         | 47.50    | 58.97    | 72.30 | 0    | 0  | 0   | 0 |
| 84.30         | 42.80    | 53.25    | 66.62 | 0    | 0  | 0   | 0 |
| 104.38        | 57.92    | 71.68    | 84.91 | 0    | 0  | 0   | 0 |
| 97.04         | 52.39    | 64.94    | 78.22 | 1    | 0  | 0   | 0 |
| 86.08         | 44.14    | 54.88    | 68.24 | 0    | 0  | 0   | 0 |
| 83.28         | 42.03    | 52.31    | 65.68 | 0    | 0  | 0   | 0 |
| 86.11         | 44.16    | 54.91    | 68.26 | 0    | 0  | 0   | 0 |
| 75.01         | 35.81    | 44.72    | 58.15 | 0    | 0  | 0   | 0 |
| 83.70         | 42.35    | 52.70    | 66.07 | 0    | 0  | 0   | 0 |
| 86.39         | 44.38    | 55.17    | 68.52 | 0    | 0  | 0   | 0 |
| 97.90         | 53.03    | 65.73    | 79.00 | 0    | 0  | 0   | 0 |
| 93.50         | 49.72    | 61.69    | 74.99 | 1    | 0  | 0   | 0 |
| 87.12         | 44.93    | 55.84    | 69.19 | 0    | 0  | 0   | 0 |
| 77.52         | 37.70    | 47.02    | 60.44 | 0    | 0  | 0   | 0 |
| 71.64         | 33.27    | 41.62    | 55.08 | 0    | 0  | 0   | 0 |
| 85.35         | 43.59    | 54.21    | 67.57 | 0    | 0  | 0   | 0 |
| 80.32         | 39.81    | 49.59    | 62.99 | 0    | 0  | 0   | 0 |
| 94.00         | 34.73    | 48.40    | 65.41 | 0    | 0  | 0   | 0 |
| 110.86        | 45.54    | 59.43    | 76.43 | 0    | 0  | 0   | 0 |
| 115.49        | 48.50    | 62.45    | 79.45 | 0    | 0  | 0   | 0 |
| 107.84        | 43.60    | 57.45    | 74.45 | 0    | 0  | 0   | 0 |
| 118.33        | 50.32    | 64.31    | 81.30 | 0    | 0  | 0   | 0 |
| 107.50        | 43.39    | 57.23    | 74.23 | 0    | 0  | 0   | 0 |
| 122.29        | 52.86    | 66.90    | 83.89 | 0    | 0  | 0   | 1 |
| 119.90        | 51.33    | 65.34    | 82.33 | 0    | 0  | 0   | 0 |
| 100.40        | 38.83    | 52.58    | 69.59 | 0    | 0  | 0   | 0 |
| 90.18         | 32.28    | 45.90    | 62.91 | 0    | 0  | 0   | 0 |

|        |       |       |       |   |   |   |   |
|--------|-------|-------|-------|---|---|---|---|
| 97.69  | 37.10 | 50.81 | 67.82 | 0 | 0 | 0 | 0 |
| 112.95 | 46.87 | 60.79 | 77.79 | 0 | 0 | 0 | 0 |
| 106.65 | 42.84 | 56.67 | 73.68 | 0 | 0 | 0 | 0 |
| 96.12  | 36.09 | 49.78 | 66.80 | 1 | 0 | 0 | 0 |
| 78.13  | 24.56 | 38.02 | 55.05 | 0 | 0 | 0 | 0 |
| 118.58 | 50.49 | 64.48 | 81.47 | 0 | 0 | 0 | 0 |
| 118.93 | 50.71 | 64.70 | 81.70 | 1 | 0 | 0 | 0 |
| 100.68 | 39.01 | 52.77 | 69.78 | 0 | 0 | 0 | 0 |
| 85.89  | 29.54 | 43.10 | 60.12 | 1 | 0 | 0 | 0 |
| 111.01 | 45.63 | 59.52 | 76.52 | 0 | 0 | 0 | 0 |
| 126.89 | 55.81 | 69.91 | 86.89 | 0 | 0 | 0 | 0 |
| 131.47 | 58.75 | 72.91 | 89.89 | 1 | 0 | 0 | 0 |
| 97.42  | 36.92 | 50.63 | 67.64 | 0 | 0 | 0 | 0 |
| 133.99 | 60.36 | 74.55 | 91.53 | 0 | 0 | 0 | 0 |
| 109.09 | 44.40 | 58.26 | 75.27 | 1 | 0 | 0 | 0 |
| 106.34 | 42.64 | 56.47 | 73.47 | 0 | 0 | 0 | 0 |
| 120.85 | 51.94 | 65.96 | 82.95 | 0 | 0 | 0 | 0 |
| 106.65 | 42.84 | 56.67 | 73.67 | 1 | 0 | 0 | 0 |
| 118.29 | 50.30 | 64.28 | 81.28 | 0 | 0 | 0 | 0 |
| 119.49 | 51.07 | 65.07 | 82.06 | 0 | 0 | 0 | 0 |
| 110.93 | 45.58 | 59.47 | 76.47 | 0 | 0 | 0 | 0 |
| 107.83 | 43.60 | 57.45 | 74.45 | 0 | 0 | 0 | 0 |
| 107.88 | 43.63 | 57.48 | 74.48 | 0 | 0 | 1 | 0 |
| 116.32 | 49.04 | 63.00 | 79.99 | 0 | 0 | 0 | 0 |
| 113.08 | 46.96 | 60.88 | 77.88 | 0 | 0 | 0 | 0 |
| 104.28 | 41.32 | 55.12 | 72.13 | 0 | 0 | 0 | 0 |
| 115.68 | 48.62 | 62.57 | 79.57 | 0 | 0 | 0 | 0 |
| 103.75 | 40.98 | 54.78 | 71.78 | 0 | 0 | 0 | 0 |
| 116.98 | 51.16 | 62.28 | 81.70 | 0 | 0 | 0 | 0 |
| 83.75  | 25.39 | 37.93 | 55.53 | 0 | 0 | 0 | 1 |
| 113.00 | 48.07 | 59.36 | 78.56 | 0 | 0 | 0 | 0 |
| 119.46 | 53.08 | 64.10 | 83.64 | 0 | 0 | 0 | 0 |
| 108.96 | 44.94 | 56.41 | 75.38 | 0 | 0 | 0 | 1 |
| 100.44 | 38.33 | 50.16 | 68.67 | 0 | 0 | 0 | 0 |
| 99.79  | 37.82 | 49.68 | 68.16 | 0 | 0 | 0 | 0 |
| 126.12 | 58.25 | 68.98 | 88.89 | 1 | 0 | 0 | 0 |
| 94.32  | 33.58 | 45.67 | 63.85 | 0 | 0 | 0 | 0 |
| 114.01 | 48.85 | 60.10 | 79.36 | 0 | 0 | 0 | 0 |
| 111.72 | 47.08 | 58.43 | 77.55 | 1 | 0 | 0 | 0 |
| 105.94 | 42.59 | 54.19 | 73.00 | 0 | 0 | 1 | 0 |
| 85.86  | 27.02 | 39.47 | 57.18 | 0 | 0 | 0 | 0 |
| 121.36 | 54.55 | 65.49 | 85.14 | 0 | 0 | 0 | 0 |
| 97.05  | 35.70 | 47.67 | 66.00 | 1 | 0 | 0 | 0 |
| 109.13 | 45.07 | 56.53 | 75.52 | 0 | 0 | 0 | 1 |
| 79.05  | 21.74 | 34.48 | 51.82 | 0 | 0 | 0 | 0 |
| 113.19 | 48.22 | 59.50 | 78.71 | 0 | 0 | 0 | 0 |
| 129.05 | 60.52 | 71.13 | 91.20 | 1 | 1 | 0 | 0 |

|        |       |       |       |   |   |   |   |
|--------|-------|-------|-------|---|---|---|---|
| 106.49 | 43.02 | 54.59 | 73.43 | 0 | 0 | 0 | 1 |
| 102.51 | 39.93 | 51.68 | 70.30 | 0 | 0 | 0 | 0 |
| 124.03 | 56.63 | 67.45 | 87.25 | 1 | 0 | 0 | 0 |
| 116.74 | 50.97 | 62.10 | 81.50 | 0 | 0 | 0 | 0 |
| 114.86 | 49.51 | 60.73 | 80.02 | 0 | 0 | 0 | 0 |
| 106.31 | 42.88 | 54.46 | 73.29 | 0 | 0 | 0 | 0 |
| 108.51 | 44.59 | 56.07 | 75.02 | 0 | 1 | 0 | 0 |
| 117.56 | 51.61 | 62.71 | 82.15 | 0 | 0 | 0 | 0 |
| 99.78  | 37.82 | 49.67 | 68.15 | 0 | 0 | 0 | 0 |
| 117.62 | 51.66 | 62.75 | 82.20 | 0 | 0 | 0 | 0 |
| 108.07 | 44.25 | 55.75 | 74.68 | 0 | 0 | 0 | 0 |
| 108.36 | 44.48 | 55.97 | 74.91 | 0 | 0 | 0 | 0 |
| 100.18 | 38.13 | 49.97 | 68.46 | 0 | 0 | 0 | 0 |
| 103.42 | 40.64 | 52.34 | 71.01 | 0 | 0 | 0 | 0 |
| 119.88 | 53.41 | 64.41 | 83.98 | 0 | 0 | 0 | 0 |
| 78.75  | 21.50 | 34.26 | 51.59 | 0 | 0 | 0 | 0 |
| 100.87 | 38.66 | 50.47 | 69.00 | 0 | 0 | 0 | 0 |
| 106.12 | 42.74 | 54.32 | 73.14 | 0 | 0 | 0 | 0 |
| 100.38 | 38.28 | 50.11 | 68.62 | 0 | 0 | 0 | 0 |
| 213.22 | 52.62 | 65.14 | 82.34 | 0 | 0 | 0 | 0 |
| 188.46 | 35.26 | 49.17 | 64.16 | 0 | 0 | 0 | 0 |
| 195.22 | 40.00 | 53.53 | 69.12 | 0 | 0 | 0 | 0 |
| 225.93 | 61.54 | 73.34 | 91.67 | 0 | 0 | 0 | 0 |
| 200.53 | 43.72 | 56.95 | 73.02 | 0 | 0 | 0 | 0 |
| 200.57 | 43.75 | 56.98 | 73.05 | 0 | 0 | 0 | 0 |
| 207.87 | 48.87 | 61.69 | 78.41 | 0 | 0 | 0 | 0 |
| 208.80 | 49.52 | 62.29 | 79.09 | 0 | 0 | 0 | 0 |
| 213.26 | 52.65 | 65.17 | 82.37 | 0 | 0 | 0 | 0 |
| 202.41 | 45.04 | 58.17 | 74.40 | 0 | 0 | 0 | 0 |
| 218.76 | 56.50 | 68.71 | 86.40 | 0 | 0 | 0 | 0 |
| 221.13 | 58.17 | 70.24 | 88.15 | 0 | 0 | 0 | 0 |
| 182.89 | 31.35 | 45.58 | 60.07 | 0 | 0 | 0 | 0 |
| 219.16 | 56.79 | 68.97 | 86.70 | 0 | 0 | 0 | 0 |
| 221.07 | 58.13 | 70.20 | 88.10 | 0 | 0 | 0 | 0 |
| 204.85 | 46.75 | 59.74 | 76.19 | 0 | 0 | 0 | 0 |
| 208.15 | 49.07 | 61.87 | 78.62 | 0 | 1 | 0 | 0 |
| 209.10 | 49.73 | 62.48 | 79.31 | 0 | 0 | 1 | 0 |
| 204.03 | 46.18 | 59.21 | 75.59 | 0 | 0 | 0 | 0 |
| 192.71 | 38.24 | 51.91 | 67.28 | 0 | 0 | 0 | 0 |
| 189.69 | 36.12 | 49.96 | 65.06 | 0 | 1 | 0 | 0 |
| 190.57 | 36.74 | 50.54 | 65.71 | 0 | 0 | 0 | 0 |
| 194.15 | 39.25 | 52.84 | 68.34 | 0 | 0 | 0 | 1 |
| 206.52 | 47.93 | 60.82 | 77.42 | 0 | 0 | 0 | 0 |
| 197.67 | 41.72 | 55.11 | 70.92 | 0 | 0 | 1 | 0 |
| 206.94 | 48.22 | 61.09 | 77.73 | 0 | 0 | 0 | 0 |
| 198.76 | 42.48 | 55.81 | 71.72 | 0 | 0 | 0 | 0 |
| 193.34 | 38.68 | 52.32 | 67.74 | 0 | 0 | 0 | 1 |

|        |       |       |       |   |   |   |   |
|--------|-------|-------|-------|---|---|---|---|
| 197.52 | 41.62 | 55.02 | 70.81 | 0 | 0 | 0 | 0 |
| 193.95 | 39.11 | 52.71 | 68.19 | 0 | 0 | 0 | 0 |
| 200.99 | 44.05 | 57.25 | 73.36 | 0 | 0 | 0 | 0 |
| 208.41 | 49.25 | 62.04 | 78.81 | 0 | 0 | 0 | 1 |
| 195.84 | 40.44 | 53.93 | 69.58 | 0 | 0 | 0 | 0 |
| 189.90 | 36.27 | 50.10 | 65.21 | 0 | 0 | 0 | 0 |
| 223.38 | 59.74 | 71.69 | 89.80 | 0 | 0 | 0 | 0 |
| 205.15 | 46.96 | 59.93 | 76.41 | 0 | 0 | 0 | 0 |
| 213.15 | 52.58 | 65.10 | 82.29 | 0 | 0 | 0 | 0 |
